# Supplementary material for: Metastable–solid phase diagrams derived from polymorphic solidification kinetics
Source: PubMed Central journal article supplement — Proc Natl Acad Sci U S A. 2021 Feb 22;118(9):e2017809118. doi: 10.1073/pnas.2017809118 (PMC7936279; doi:10.1073/pnas.2017809118), 2021-02-22
Supplement: pnas.2017809118.sapp.pdf [file pnas.2017809118.sapp.pdf]

1

## 2 **Supplementary Information for**

### 3 **Metastable-solid phase diagrams derived from polymorphic solidification kinetics**

4 **Babak Sadigh, Luis Zepeda-Ruiz, Jonathan L. Belof**

5 **To whom correspondence should be addressed: Babak Sadigh, Jonathan L. Belof.**

6 **E-mail: sadigh1@llnl.gov, belof1@llnl.gov**

#### 7 **This PDF file includes:**

8     Supplementary text

9     Figs. S1 to S15

10    References for SI reference citations

## 11 Supporting Information Text

### 12 Thermodynamic phase diagram

13 The temperature-pressure phase diagram of the EAM model system has been directly calculated from two-phase (solid-liquid)  
14 coexistence simulations. For this purpose, we have performed simulations in an isobaric-isoenthalpic (NPH) ensemble (1–4).  
15 This can be considered a closed ensemble, as there is no energy exchange with an external bath, since the total system’s  
16 enthalpy is kept fix. At the bulk melting point  $T_m$ , the free energies of the liquid and the solid phases are equal. However, the  
17 enthalpy of the solid  $H_S^m$  is lower than that of the liquid  $H_L^m$ . This discrepancy is observed in real-world experiments as latent  
18 heat  $\Delta H_m = H_L^m - H_S^m$ , released during the crystallization process. If the total enthalpy of the simulation cell  $H_{sys}$  is chosen  
19 in the range  $H_S^m < H_{sys} < H_L^m$ , the system will necessarily equilibrate into a solid-liquid coexistence. For an S-L coexistence  
20 with flat boundaries, it can readily be shown that the system temperature equilibrates at  $T_m$  (5). Such an S-L equilibrium can  
21 be established by designing an elongated computational cell, with  $H_{sys}$  chosen in the neighborhood of  $1/2(H_S^m + H_L^m)$ .

22 For the calculation of the fcc-liquid coexistence line, we have chosen computational cells containing 160,000 atoms, composed  
23 of  $20 \times 20 \times 100$  primitive fcc unit cells with 4 atoms in each cell, which are arranged through stacking of fcc (001) layers. For  
24 the bcc-liquid line, computational cells containing 216,000 atoms have been used that are composed of  $30 \times 30 \times 120$  primitive  
25 bcc unit cells with 2 atoms per cell, arranged through stacking of bcc (001) layers. The hcp-liquid coexistence line has been  
26 obtained via computational cells containing 83200 atoms, composed of  $26 \times 50 \times 16$  hcp orthorhombic unit cells with 4 atoms  
27 per cell that are arranged by stacking hcp-(11 $\bar{2}$ 0) layers. The orthorhombic hcp unit cell has the lattice vectors:  $\mathbf{a}_1 = (0, 0, c/a)$ ,  
28  $\mathbf{a}_2 = (1, 0, 0)$ ,  $\mathbf{a}_3 = (0, \sqrt{3}, 0)$ . In the ideal hcp crystal  $c/a = \sqrt{8/3}$ .

29 Recall now that the free energies of non-pathological single-phase systems decrease monotonically with temperature, and  
30 the liquid free energy due to its larger entropy slopes down steeper than the free energy of any solid phase. Hence the free  
31 energy curves of the liquid and every solid phase  $\phi$  cross at one and only one point  $T_m^\phi$ . Consequently, the thermodynamic  
32 melting point  $T_m$  coincides with the highest  $T_m^\phi$ .

33 It is thus found that the phase with the highest  $T_m$  is the fcc phase at  $P < 71.6$  GPa, the hcp phase in the interval  
34  $71.6 < P < 85$  GPa, and the bcc at  $P > 85$  GPa. Figure S1 shows the melt lines of the three phases bcc, fcc and hcp in the  
35 pressure range 40-100 GPa. We observe three triple points, one at 71.6 GPa and 3320 K, where liquid-hcp-fcc coexist, and one  
36 at 85 GPa and 3598 K, where liquid-hcp-bcc are at three-phase equilibrium. There also exists an fcc-bcc-liquid triple point at  
37 79.5 GPa and 3478 K. It is slightly lower than the hcp melting point of 3487 K at this pressure, and therefore does not appear  
38 in the thermodynamic phase diagram, see Fig. 1 in the main text. Of course, these numbers are so close to each other that in  
39 practice, all four phases in the vicinity of 80 GPa can be considered thermodynamically stable.

40 A consequence of locating a triple point along the melt line is that it can be used as the starting point for integration of the  
41 phase boundary  $T_{cx}(P)$  of the two coexisting crystal phases  $P_1$  and  $P_2$ , using the Clausius-Clapeyron relation, according to  
42 which, the slope of the phase boundary is related to the ratio of the latent volume to the latent heat of the transition between  
43 the two phase:

$$44 \quad \frac{dT_{cx}}{dP} = T_{cx} \left. \frac{\omega_{P_1} - \omega_{P_2}}{H_{P_1} - H_{P_2}} \right|_{T_{cx}, P} \quad [1]$$

45 Above,  $\omega_{P_1}$  and  $H_{P_1}$  denote the volume and the enthalpy per atom at pressure  $P$  and the coexistence temperature  $T_{cx}(P)$   
46 for phase  $P_1$ .

47 We have calculated the hcp-bcc and the fcc-bcc phase boundaries by integration of Eq. 1 with 5 GPa and 10 GPa pressure  
48 increments respectively. Each equilibrium volume/enthalpy calculation involved averaging over a 1 ns MD-NPT simulation for  
49 the hcp-bcc and 2 ns for the fcc-bcc boundary, corresponding to 1000000 and 2000000 time steps respectively. The simulation  
50 supercells consisted of  $20 \times 20 \times 20$  bcc unit cells (16000 atoms),  $20 \times 20 \times 20$  fcc unit cells (32000 atoms), and  $22 \times 13 \times 14$   
51 orthorhombic hcp unit cells (16016 atoms). Each integration started from the triple point of that boundary. They are shown  
52 in Fig. S1, as well as in Fig. 1 of the main text. The coexistence lines have substantial curvatures. The hcp-bcc line starting at  
53 85 GPa, has a slope of nearly 11 K/GPa, which shrinks monotonically to about 6 K/GPa at 170 GPa. The fcc-bcc line has a  
54 smaller slope of 5.3 K/GPa at 80 GPa, which further decreases to 0.9 K/GPa at 120 GPa, and then rises again and exceeds 3  
55 K/GPa at 160 GPa. The hardest phase boundary to calculate accurately is the fcc-hcp line, which is nearly vertical, due to  
56 the similarity of the two phases, and its calculation requires small pressure increments. Figure S2 shows the fcc-hcp energy  
57 differences per atom at 0 K, which exhibits a transition pressure of 50 GPa. In the same pressure range at 0 K, the bcc phase  
58 is much higher in energy: 0.0455 eV/atom above fcc at 0 GPa. This energy difference decreases only slightly with pressure. At  
59 100 GPa, it becomes 0.0395 eV/atom.

60 Let us digress briefly here to discuss in some detail the algorithm we devised for efficient computation of the hcp-fcc  
61 coexistence line. As mentioned earlier, the two-phase simulations revealed an fcc-hcp-liquid triple point at 71.6 GPa and  
62 3320 K. Performing equilibrium solid-phase simulations using the same fcc and hcp simulation cells as described above at this  
63 condition with simulation times of 2 ns, and using Eq. 1, we calculate the pressure-derivative of the hcp-fcc coexistence-line at  
64 the triple point  $\dot{T}_{cx}(71.6) = 101.36$  K/GPa. Combining this with the fcc-hcp energy difference at 0 K, which becomes zero at  
65 50 GPa, see Fig. S2, we can make a first ansatz for the shape of the line:

$$66 \quad T_{cx}^{(0)}(P) = 3320 + 101.36 (P - 71.6) - 2.42332 (P - 71.6)^2. \quad [2]$$

67 Next we improve the fidelity of this approximation by choosing an intermediate pressure, e.g. 60 GPa, where we calculate  
68 at several temperatures, e.g. 1876 K, 1990 K, 2036 K, 2448, the equilibrium volumes and enthalpies of the two phases and

69 plug into Eq. 1 to obtain four candidate phase-coexistence slopes at  $P = 60$  GPa, which we denote in the following by  $\dot{T}_{60}(T)$ .  
 70 Through a line fit to this data, we obtain the following equation for the dependence of the slope of the coexistence line at 60  
 71 GPa on the coexistence temperature

$$72 \quad \dot{T}_{60}(T) = -64.6834 + 0.0969619T. \quad [3]$$

73 Note that  $T_{\text{cx}}^{(0)}(60) \approx 1818$ . We now make an improved ansatz

$$74 \quad T_{\text{cx}}^{(1)}(P) = 3320 + 101.36 (P - 71.6) + C (P - 71.6)^2 + D (P - 71.6)^3. \quad [4]$$

75 The two unknown coefficients  $C$  and  $D$  can now be determined by the two known relations: Eq. 3 and  $T_{\text{cx}}(50) = 0$ . The result  
 76 is  $C = 1.9338$  and  $D = 0.2017$ . Consequently,  $T^{(1)}(60) = 2090$ . We chose to stop at this level. But this procedure can be  
 77 continued for systematic improvement of the phase line.

78 We have also independently verified the fcc-bcc phase boundary calculated above at three pressures, 80, 120, and 180 GPa  
 79 with thermodynamic integration from bcc to fcc along the Bain path. Good agreement between the two methods has been  
 80 found.

81 For a more in-depth view of the multiphase thermodynamics of the EAM model-Cu system, we redraw its thermodynamic  
 82 phase diagram in the temperature-density plane, see Fig. S3. Furthermore, the pressure dependences of the latent volumes and  
 83 latent heats of melting are shown in Figs. S4 and S5. Note the discontinuous jumps at the triple points. In particular, the  
 84 specific volume of the hcp phase is smaller than the fcc phase by about 0.14% at their triple point. At 0 K this discrepancy  
 85 increases to nearly 0.3% at 70 GPa.

## 86 SCL basins and thermodynamics of multiphase metastable equilibria

87 It is interesting to note that pure bcc and fcc metastable clusters embedded in liquid are homogeneous single-phase solids both  
 88 in their cores and at their interfaces with the melt. This is in contrast to previous studies of solidification in the Lennard-Jones  
 89 system (6–8), where critical nucleation on the order of thousand atoms was induced by order-parameter-based ( $Q_6$ ) umbrella  
 90 sampling, and it was found that the fcc critical nuclei interface the liquid through a bcc shell. We have studied fcc and bcc  
 91 nuclei coexisting with liquid at pressures ranging from 0 (20 for bcc) to 100 GPa, and sizes ranging from a few thousand  
 92 to nearly a million. They are all nearly spherical in shape and exhibit negligible structural heterogeneity at the liquid-solid  
 93 interfaces. However, when examining the hcp clusters, see Fig. 3(c) in the main text, we find that the hcp-(0001) facets  
 94 interface the liquid by transforming to fcc-(111). The appearance of an fcc shell structure at the hcp/liquid interface for only  
 95 certain orientations is a clear manifestation of strong hcp/liquid interfacial anisotropy.

96 In order to rationalize the fcc shell structure on the hcp-(0001) facets, we have calculated the stacking fault energies in the  
 97 hcp phase at 0 K as shown in Fig. S6. It displays the energetics of an intrinsic and an extrinsic stacking fault in the hcp crystal.  
 98 In order to understand the atomic arrangements in these structure, one needs to know that there is degeneracy in optimal  
 99 stacking of close-packed planes of hard spheres. The hcp phase corresponds to the periodic AB stacking, and the fcc phase to  
 100 the periodic ABC stacking. An intrinsic stacking fault in the hcp phase can be formed by the non-periodic ..ABABCBCB..  
 101 stacking of the (0001) planes, while an extrinsic stacking fault corresponds to inserting a C plane into the structure to obtain  
 102 ..ABABCABAB.. The stacking fault energies shown in Fig. S6 are an order of magnitude smaller than the fcc-liquid interfacial  
 103 free energies, which range from 382 ergs/cm<sup>2</sup> at 40 GPa to 525 ergs/cm<sup>2</sup> at 80 GPa, using the Turnbull coefficient of 0.54 as  
 104 calculated in the main text. As was noted in the previous section, the volume mismatch between the hcp and the fcc stacking  
 105 only decreases with temperature, and there is no reason to believe temperature will markedly increase the stacking fault free  
 106 energies. We have nevertheless studied the stability of a periodic 7-layer extrinsic stacking fault approximant ABABCAB, at  
 107 80 GPa by calculating its melting point via two-phase simulations and comparing it with those of the hcp and the fcc phases.  
 108 The periodic slab supercells used for these simulations contained 91000 atoms with similarly elongated shapes as previously  
 109 described for hcp-liquid two-phase simulations. The calculated melting point for this structure was 3487 K, to be compared  
 110 with the fcc melting point of 3489 K and the hcp melting point of 3497 K. This implies that the free energy cost of growing fcc  
 111 shells in the interface region between an hcp substrate and the liquid is quite small. As a result, it is reasonable to expect  
 112 that there exist MSCL basins that contain clusters composed of mixed fcc/hcp stackings in equilibrium with the liquid. An  
 113 example of such a cluster is shown in Fig. 3(d) in the main text. It is important to note that these basins are distinct and  
 114 weakly coupled to each other and to the single-phase MSCLs illustrated in Figs. 4(a)-(c) in the main text.

115 The main question that now arises is whether there are mixed bcc/closed-packed MSCL basins. While it is quite easy to  
 116 imagine mixed bcc/close-packed configurations, such as shown in Fig. S7, we have not been able to find a solid-liquid metastable  
 117 (long-lived) equilibrium with the solid phase comprised of close-packed and bcc regions in coexistence. The configuration shown  
 118 in Fig. S7 was generated in a simulation box containing 314928 particles at 60 GPa that initially contained a pure bcc cluster  
 119 at equilibrium with liquid in the NPH ensemble. The cluster was slowly shrunk by reducing the total enthalpy of the NPH  
 120 ensemble until no discernible solid cluster was left in the simulation box. Then the ensemble was switched to NPT, and the  
 121 temperature was dropped down to 2200 K, corresponding to the homogeneous nucleation start temperature  $T_{HS}$  at 60 GPa.  
 122 Subsequently, nucleation and growth of a mixed bcc/fcc cluster occurred, which is shown in Fig. S7. Once the cluster size  
 123 exceeded 30000 particles, the ensemble was switched back to NPH and the multiphase system was equilibrated for over 1 ns at  
 124 60 and 80 GPa. At 60 GPa, the bcc fraction of the cluster gradually vanished during relaxation. In contrast, equilibration  
 125 of the mixed bcc/fcc/hcp cluster at 80 GPa, lead to gradual disappearance of the fcc and hcp parts, and eventually a pure  
 126 bcc-liquid two-phase equilibrium was obtained. We thus conclude that while the mixed-phase bcc/close-packed clusters can be

127 generated by kinetic processes for short times, they are not metastable, and rather belong to the transient region between two  
128 MSCL basins.

## 129 Solid-nucleation phase boundaries

130 In order to better understand the structure of the solutions of Eq. 12 of the main text, we elaborate below on explicit expressions  
131 for its left-hand side. The right-hand side (RHS) is small and can be treated as a perturbation. We start by expressing the  
132 excess free energy  $\Delta G_S(N_S)$  of a solid-liquid equilibrium composed of a solid nucleus of size  $N_S$  embedded in the melt, by a  
133 first-order expansion in deviation of the undercooling temperature  $T$  from the melting point  $T_m$  (see Eq. 7 in the main text),  
134 and using the Turnbull ansatz for the interfacial free energy Eq. 9 of the main text:

$$135 \quad \Delta G_S(T) = N_S \frac{\Delta H_m}{T_m} (T - T_m) + (36\pi N_S^2)^{2/3} \frac{\Delta H_m}{v_S^{2/3}} \alpha. \quad [5]$$

136 By combining the generalized Gibbs-Thomson relation Eq. 6 of the main text, with the Turnbull ansatz Eq. 9 of the main text,  
137 we obtain

$$138 \quad N_S(T) = \frac{32\pi}{3} \left( \frac{T_m \alpha}{T_m - T} \right)^3. \quad [6]$$

139 Inserting the above into Eq. 5, we find the following zeroth-order solution  $T_{cp}^{*(0)}$  of Eq. 12 in the main text, i.e. when its RHS is  
140 set to zero

$$141 \quad \frac{T_{cp}^{*(0)} - T_m^{cp}}{T_{cp}^{*(0)} - T_m^{bcc}} = \frac{T_m^{cp}}{T_m^{bcc}} \sqrt{\left( \frac{\alpha_{cp}}{\alpha_{bcc}} \right)^3 \frac{\Delta H_m^{cp}}{\Delta H_m^{bcc}}}. \quad [7]$$

142 The above represents the equation of the thermodynamic solid-solid (cp-bcc) phase-lines of the critical nuclei, with cp  
143 representing either of the closed-packed phases fcc or hcp. It requires the knowledge of the Turnbull coefficients, latent heats  
144 and melting temperatures of all phases of interest, in our case bcc, fcc, and hcp. All these quantities have been explicitly  
145 determined previously in this paper except  $\alpha_{hcp}$ . It is expected to be very similar to  $\alpha_{fcc}$  but larger. We have solved Eq. 12  
146 assuming  $\alpha_{hcp} = \alpha_{fcc} = 0.54$ , and the resulting  $T_{fcc}^*$  and  $T_{hcp}^*$  are shown as solid lines in Fig. S8. The nucleation phase line  
147  $T^*(P)$  is the minimum of  $T_{fcc}^*$  and  $T_{hcp}^*$  at every pressure, and is shown in Fig. 5 of the main text. The triple point pressure  
148 where  $T_{fcc}^* = T_{hcp}^*$  is at 71.9 GPa, where  $T^* = 3263$ . Fig. S8 also shows how  $T_{hcp}^*$  change if  $\alpha_{hcp}$  is significantly increased to  
149 0.56. This is shown by the dashed line in Fig. S8, where the triple point has now moved up to nearly 74 GPa. This constitutes  
150 a 2 GPa uncertainty in the location of the fcc-bcc-hcp coexistence point of the critical solid nuclei embedded in the melt.

## 151 Kinetic stability of postcritical clusters

152 We intend to study below the kinetic stabilities of postcritical nuclei by simulating their growth via MD simulations within the  
153 NPT ensemble. As described in the main text, this study involves three steps: (i) preparing atomistic configurations of critical  
154 solid-phase clusters embedded in the melt at different undercooling temperatures, (ii) initiating dynamic trajectories from these  
155 configurations, and (iii) characterizing the evolution of their solid-phase content as the solid clusters grow. The most difficult  
156 task is the preparation of critical clusters at large undercoolings. The method implemented here, which is described below, is  
157 only one of many approaches. Certainly bias-potential methods using bond-orientational order parameters as employed in the  
158 past in e.g. (6) and (9) can be quite effective in this regard.

159 For the present study we have followed the following protocol:

- 160 1. Start with a metastable bcc-liquid equilibrium in the core of the MSCL domain, obtained through the closed-ensemble  
161 (NPH) technique.
- 162 2. Shrink the cluster slowly within the NPH ensemble by smoothly and reversibly increasing the system's enthalpy  $H_{sys}$ .
- 163 3. Above a threshold value for the system's enthalpy  $H_{sys} > H_{SL}^{th} < H_L^m$ , where  $H_L^m$  is the liquid enthalpy at the melting  
164 point, the solid-liquid coexistence becomes unstable and solid-phase clusters shrink and vanish, eventually leaving a  
165 homogeneous liquid behind.
- 166 4. Store solid-liquid configurations along the shrinking trajectory. For each configuration, identify the cluster size  $N_S$   
167 and the coexistence temperature  $T_c(N_S)$ . The latter is determined by switching to the NPT ensemble, and finding the  
168 temperature above which the cluster shrinks, and below which the cluster grows.
- 169 5. Find the smallest cluster size  $N_u$ , which grows to large sizes in the bcc phase without phase transformation. Smaller  
170 clusters of size  $N_S < N_u$  with coexistence temperatures  $T_c(N_S) < T_c(N_u) = T_u$ , exhibit phase transformation to fcc/hcp  
171 when growing. In this way, we identify for every pressure  $P$ , the lower bound  $T_u(P)$  to the kinetic stability of bcc-phase  
172 clusters. Below this temperature, the growing bcc nuclei readily transform to close-packed structures.

173 We have performed the above procedure for bcc-MSCL in 314928-particle computational cells and have extracted  $T_u(P)$   
174 at four pressures: 20, 30, 40, and 60 GPa. We have thus found that at large undercoolings, the growing bcc nuclei become  
175 structurally unstable towards phase transformation to the more stable close-packed phases. An illustrative example is shown  
176 in Fig. S9, which depicts a solid critical cluster at 30 GPa on the verge of dynamic instability. It was obtained by slowly  
177 shrinking a metastable bcc cluster in the NPH ensemble down to 200 particles with predominantly bcc symmetry. When  
178 growing this cluster at 1860 K in the NPT ensemble, it transitions to the fcc phase. However, at 1863 K, it grows to large  
179 sizes in the bcc phase. The conventional explanation for this instability is that the bulk bcc phase becomes dynamically  
180 unstable at sufficiently low temperatures (large undercoolings). As a contrast, we show below that fast interface kinetics can  
181 generate far-from-equilibrium nuclei outside the scope of CNT that can have reduced kinetic barriers towards solid-solid phase  
182 transformations. This mechanism is explicitly non-equilibrium and interface-driven and cannot be traced to the dynamical  
183 structural properties of the bulk crystal phase alone.

184 An example of such a transformation is shown in Fig. S10. An 800-particle mixed fcc/hcp-phase critical cluster, is obtained  
185 by shrinking a mixed fcc/hcp solid-liquid equilibrium, see Fig. 4(d), in the NPH ensemble at pressure  $P = 70$  GPa. Growing  
186 this cluster by MD simulations in the NPT ensemble at the coexistence temperature  $T_c = 2800$  K, causes partial transformation  
187 to the bcc phase shown in Fig. S10(a). Slightly larger critical clusters at coexistence temperatures above 2800 K do not exhibit  
188 structural transformation to bcc. It is hard to explain the partial transition to bcc, shown in Fig. S10(a), by energetic arguments  
189 purely based on the dynamical stability of the bulk bcc crystal. The reason for this is that the bcc phase is entropically  
190 stabilized at high temperatures with respect to the fcc phase, and therefore becomes only less stable as temperature is lowered.  
191 Hence, a mechanism involving explicit liquid-solid interface structure and dynamics must be invoked. We illustrate the role  
192 of interfacial kinetics in driving the structural phase transformation by simulating the growth of the same 800-atom cluster  
193 starting at the coexistence temperature  $T_c = 2800$  K, but this time the growth rate is slowed down by continuous heating at a  
194 rate of 0.5 K/ps. The end result of this process is shown in Fig. S10(b), where it can be observed that the slower growth rate  
195 has suppressed transformation to bcc.

## 196 Extraneous-phase interface layers: Interfacial phase transformations and growth mode transitions

197 The mobilities of the (0001) interfaces in the linear mobility regime outside of the  $\Delta_a$  temperature interval, were calculated  
198 using periodic slab geometries containing 160000 particles composed of  $40 \times 20 \times 50$  hcp 4-atom orthorhombic unit cells. The  
199 mobilities of the (11 $\bar{2}$ 0) interfaces were calculated using periodic slab geometries containing 332800 particles composed of  
200  $52 \times 50 \times 32$  hcp 4-atom orthorhombic unit cells. All the studies involving the  $\Delta_a$  temperature interval, the phase transformation  
201 and the growth mode transition were based on two-phase simulations in periodic slab geometries containing 640000 particles  
202 composed of  $80 \times 40 \times 50$  4-atom orthorhombic unit cells.

## 203 References

- 204 1. G.J. Martyna, D.J. Tobias, and M.L. Klein (1994) Constant Pressure Molecular Dynamics Algorithms. *J. Chem. Phys.*  
205 **101**(5):4177.
- 206 2. M. Parrinello, A. Rahman (1981) Polymorphic Transitions in Single Crystals: A New Molecular Dynamics Method. *J.*  
207 *Appl. Phys.* **52**(12):7182-7190.
- 208 3. M.E. Tuckerman, J. Alejandre, R. Lopez-Rendon, A.L. Jochim, G.J. Martyna (2006) A Liouville-Operator Derived  
209 Measure-Preserving Integrator for Molecular Dynamics Simulations in the Isothermal-Isobaric Ensemble. *J. Phys. A: Math*  
210 *Gen.* **39**(19):5629-5651.
- 211 4. W. Shinoda, M. Shiga, M. Mikami (2004) Rapid Estimation of Elastic Constants by Molecular Dynamics Simulation  
212 under Constant Stress. *Phys. Rev. B* **69**(13):134103.
- 213 5. L.A. Zepeda-Ruiz, B. Sadigh, A. A. Chernov, T. Haxhimali, A. Samanta, T. Opperstrup, S. Hamel, L.X. Benedict, J.L.  
214 Belof (2017) Extraction of Effective Solid-Liquid Interfacial Free Energies for Full 3D Solid Crystallites from Equilibrium  
215 MD Simulations. *J. Chem. Phys.* **147**(19):194704.
- 216 6. P.R. ten Wolde, M.J. Ruiz-Montero, D. Frenkel (1995) Numerical Evidence for bcc Ordering at the Surface of a Critical  
217 fcc Nucleus. *Phys. Rev. Lett.* **75**(14):2714.
- 218 7. P.R. ten Wolde, M.J. Ruiz-Montero, D. Frenkel (1996) Numerical Calculation of the Rate of Crystal Nucleation in a  
219 Lennard-Jones System at Moderate Undercooling. *J. Chem. Phys.* **104**(24):9932-9947.
- 220 8. C. Desgranges and J. Delhommelle (2007) Controlling Polymorphism during the Crystallization of an Atomic Fluid. *Phys.*  
221 *Rev. Lett.* **98**(23):235502.
- 222 9. A. Samanta, J. Belof (2018) The Thermodynamics of a Liquid-Solid Interface at Extreme Conditions: A Model Close-Packed  
223 System up to 100 GPa. *J. Chem. Phys.* **149**(12):124703.

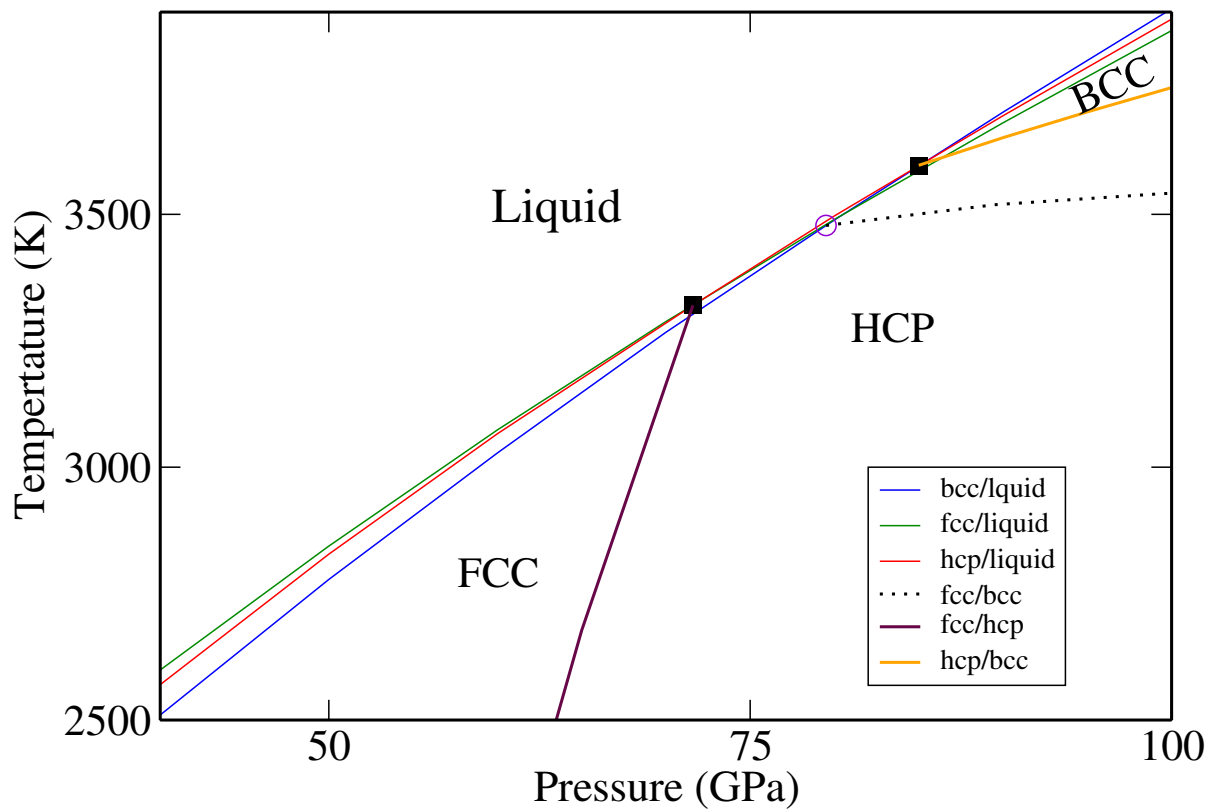

**Fig. S1.** Detailed temperature-pressure phase diagram of Mishin Cu model. There exist three bulk triple points: (i) liquid-hcp-fcc coexistence at 71.6 GPa and 3320 K, (ii) liquid-fcc-bcc coexistence at 79.5 GPa and 3478 K, and (iii) liquid-hcp-bcc coexistence at 85 GPa and 3598 K. The two thermodynamic triple points at 71.6 GPa and 85 GPa are marked in the figure by two filled squares. The third triple point at 79.5 GPa is only metastable and is actually in the region of thermodynamic stability of the hcp phase. It is marked in the figure by the open circle.

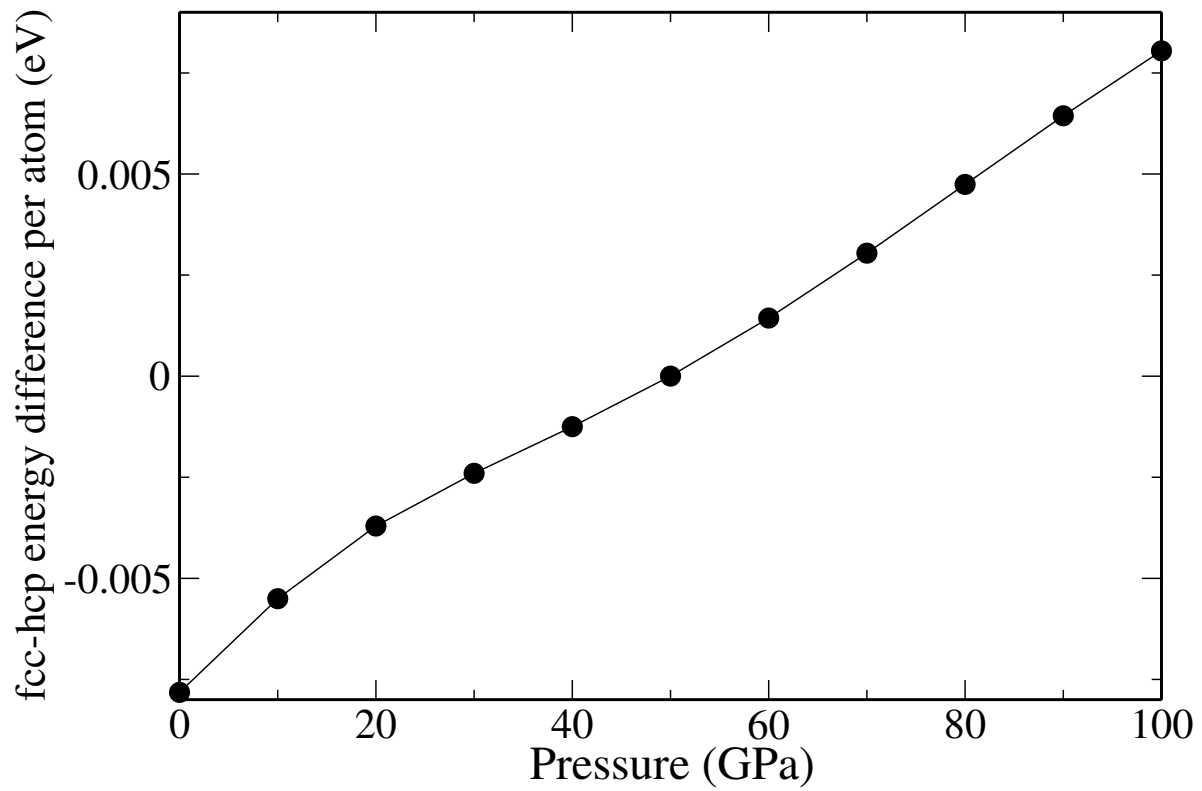

**Fig. S2.** Energy difference between the fcc and the hcp phases as a function of pressure at 0 K. Note the transition pressure at 50 GPa. Below this pressure fcc is the stable phase, and above it, hcp becomes stable.

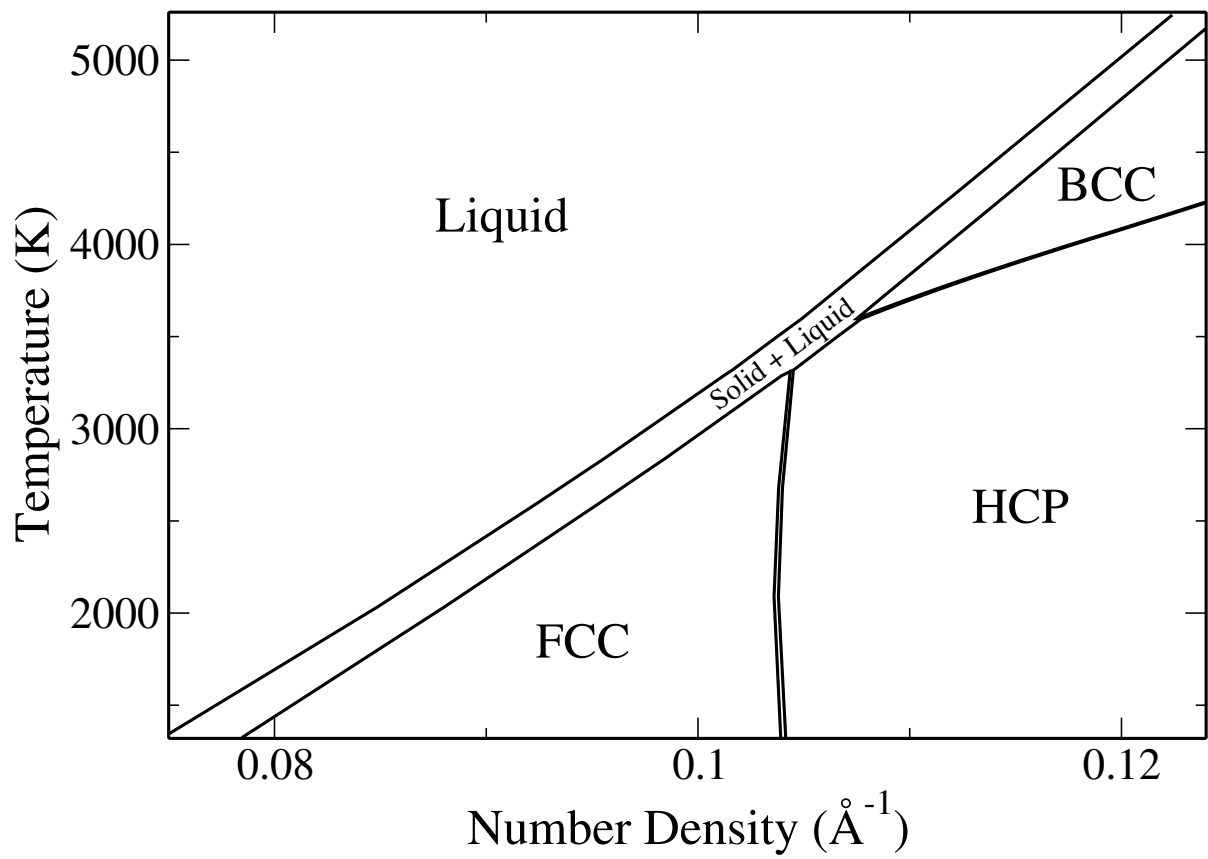

**Fig. S3.** Thermodynamic phase diagram of the EAM-Cu model in the temperature-density plane. Its representation in the temperature-pressure plane is depicted in Fig. 1 of the main text.



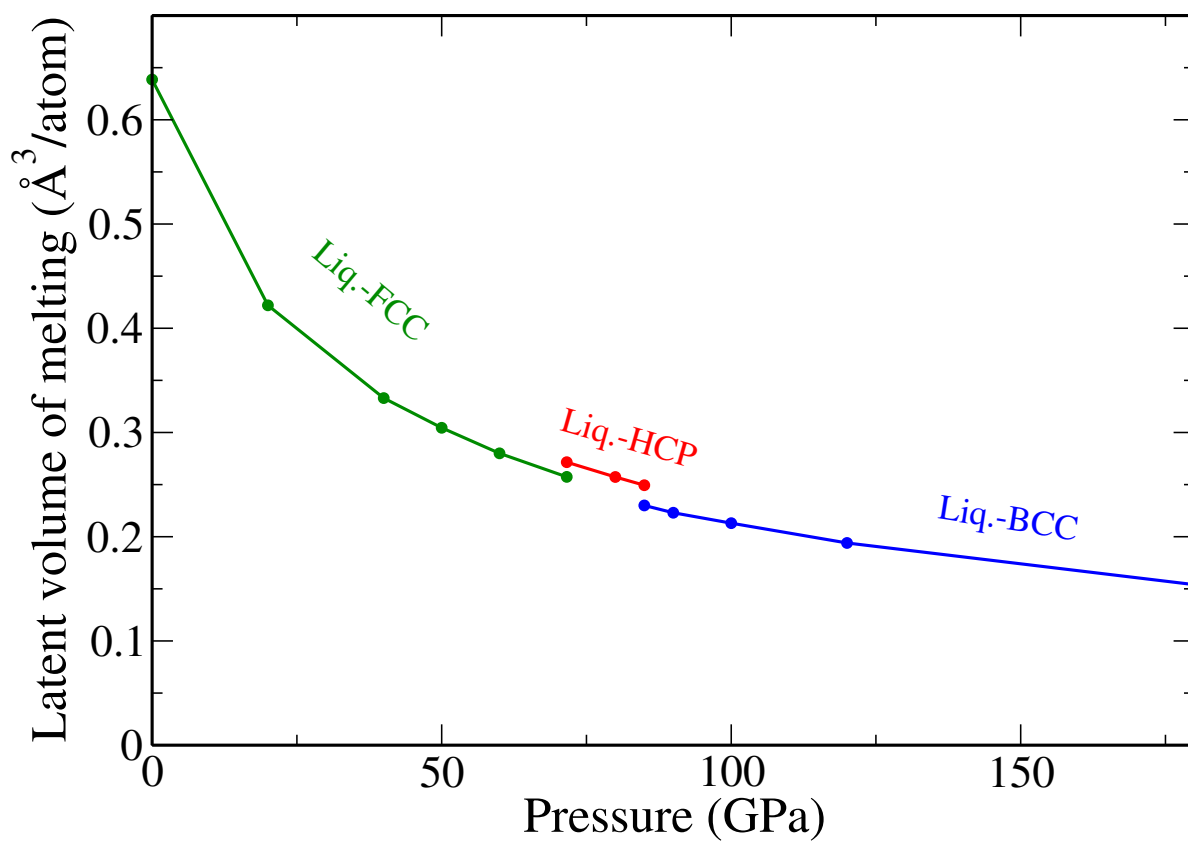

**Fig. S4.** Latent volumes of melting (the difference in volume between the liquid and the solid phases at coexistence) as a function of pressure. The different colors depict the different solid phases (fcc:green, hcp: red, bcc: blue), from which equilibrium melting occurs.

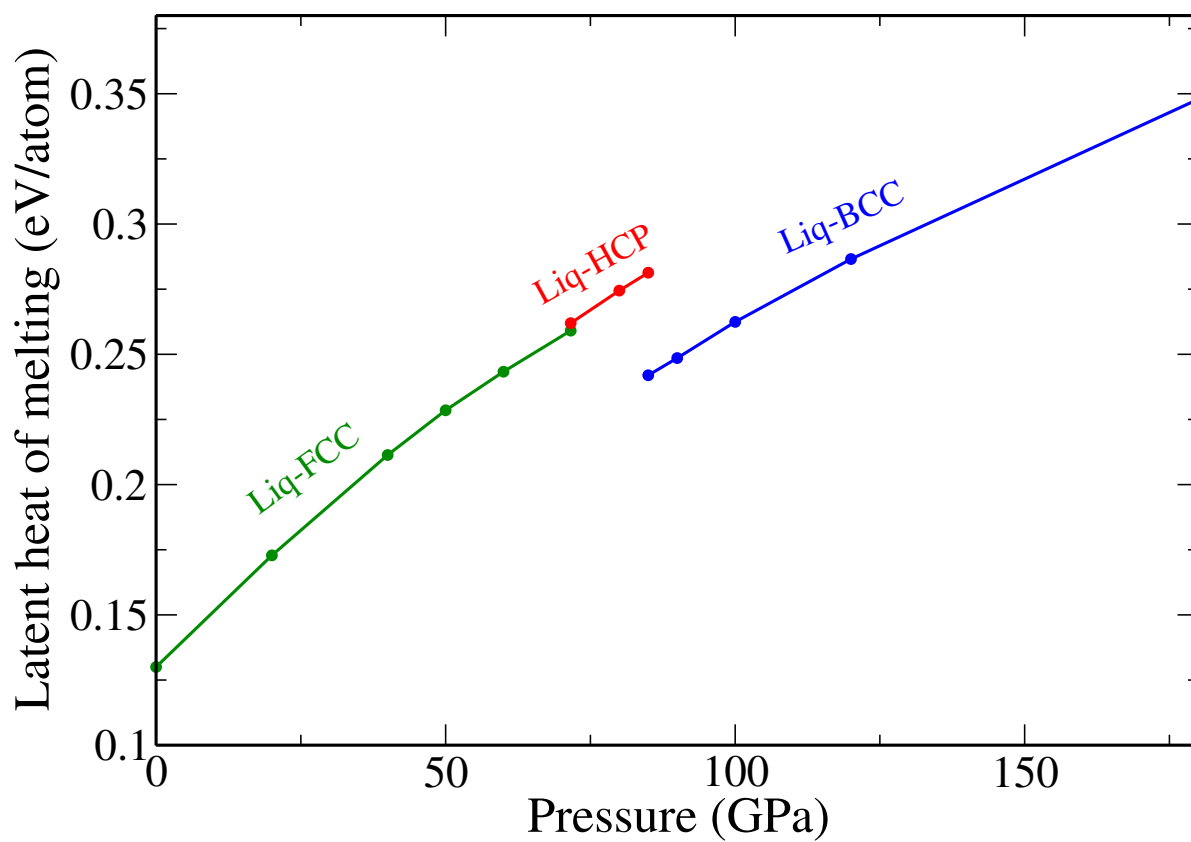

**Fig. S5.** Latent heats of melting (the difference in enthalpy between the liquid and the solid phases at coexistence) as a function of pressure. The different colors depict the different solid phases (fcc:green, hcp: red, bcc: blue), from which equilibrium melting occurs.

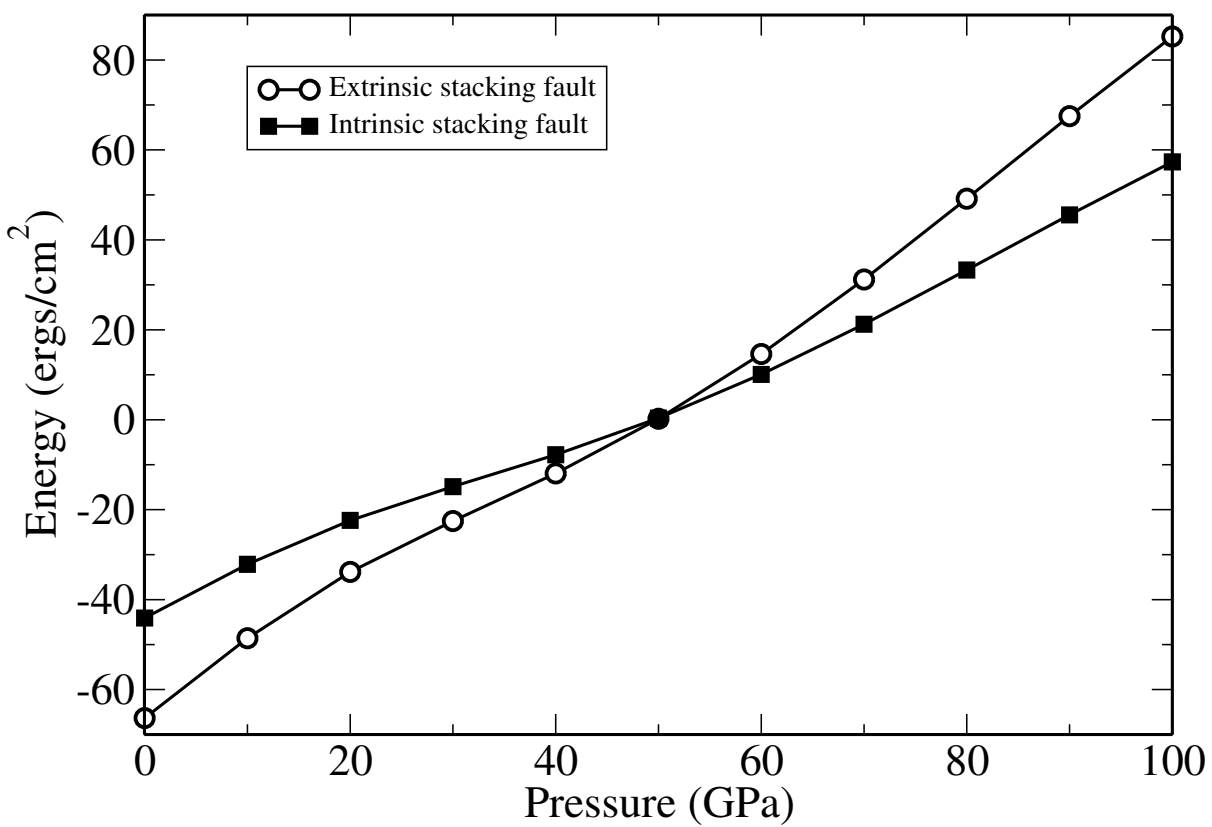

Fig. S6. The energies of an extrinsic and an intrinsic stacking fault in the hcp phase at 0 K. The negative energies at small pressures reflect the stability of the fcc phase.

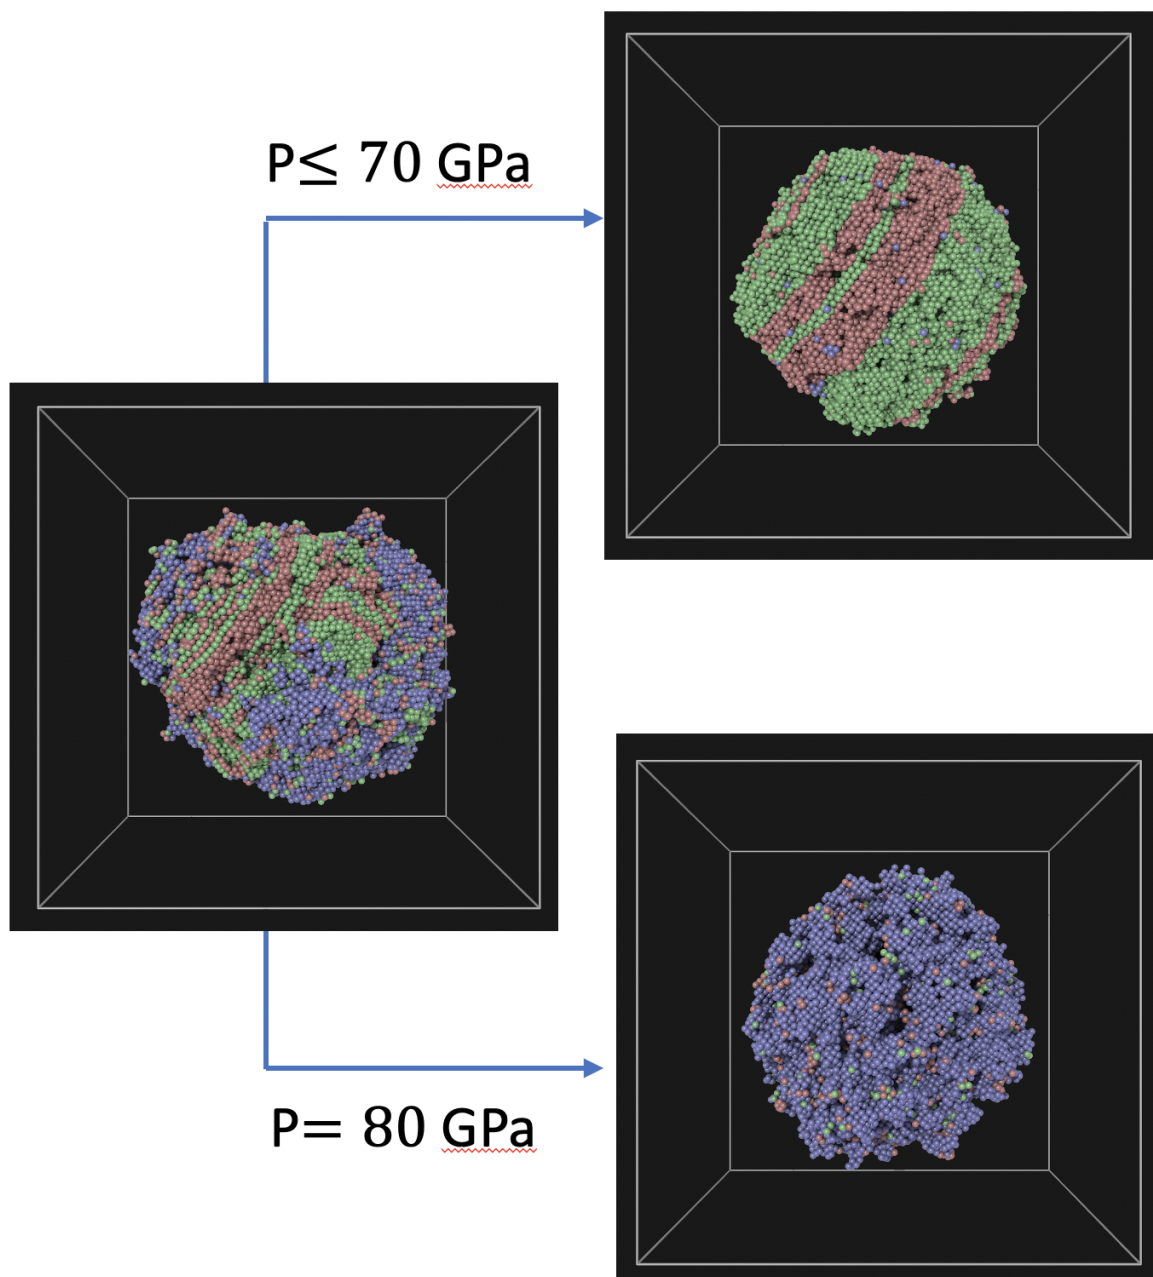

**Fig. S7.** A mixed bcc-fcc-hcp cluster embedded in liquid obtained from an unstable postcritical bcc cluster at 60 GPa and 2200 K. Upon equilibration in the NPH ensemble, it relaxes into the mixed fcc/hcp metastable-cluster configuration at pressures 70 GPa and below. At 80 GPa it can equilibrate to a bcc cluster configuration in coexistence with the melt.

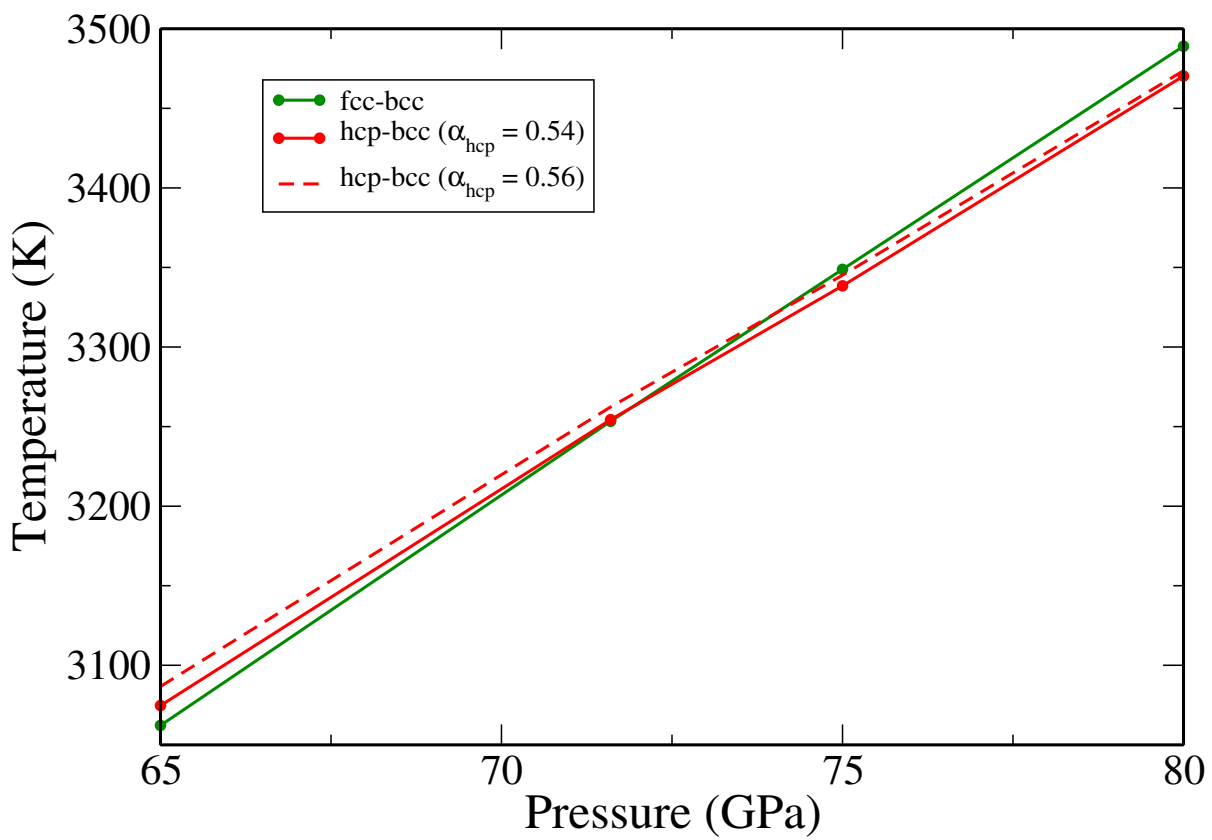

**Fig. S8.** Solid-nucleation phase boundaries. The solid lines depict  $T_{\text{fcc}}^*(P)$  (green) and  $T_{\text{hcp}}^*(P)$  (red), assuming  $\alpha_{\text{fcc}} = \alpha_{\text{hcp}} = 0.54$ . The dashed line shows  $T_{\text{hcp}}^*(P)$  for  $\alpha_{\text{hcp}} = 0.56$ .

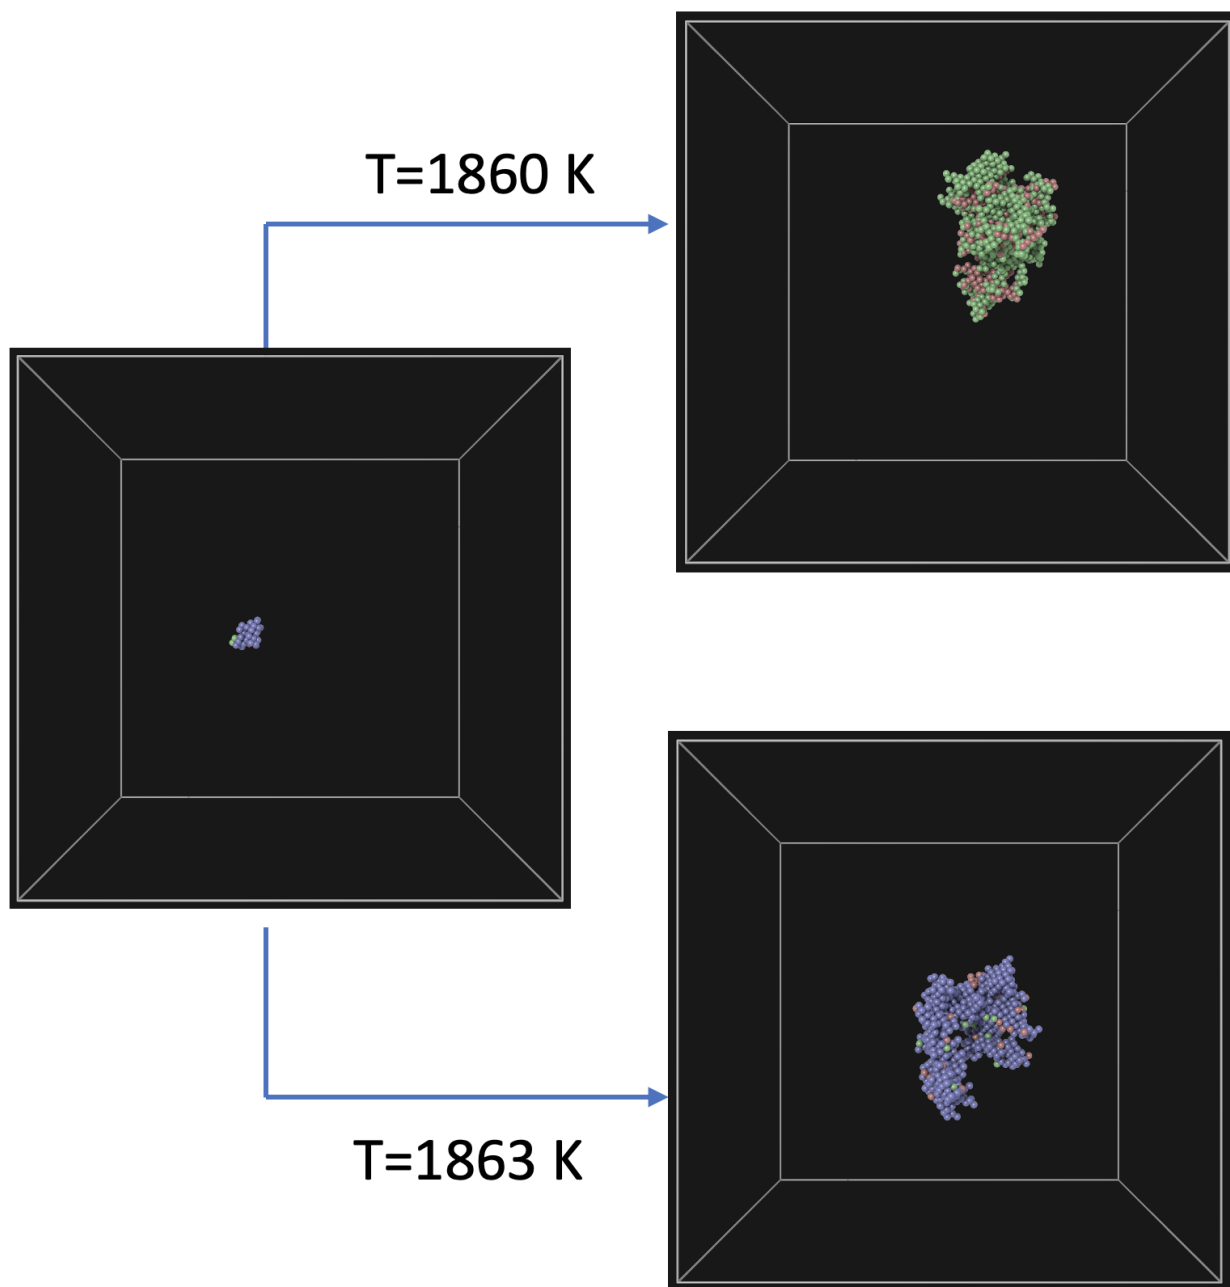

**Fig. S9.** Example of a bcc critical cluster on the verge of kinetic phase stability. A 200-particle cluster is obtained by continuous shrinking of a metastable bcc cluster, see Fig. 3(b) in the main text, at 30 GPa, via reduction of the total enthalpy of the system in an NPH ensemble. The results of two NPT simulations at 1860 K and at 1863 K is shown. At 1860, the growing cluster transforms to fcc, while at 1863 K, no phase transformation is observed. Particles with bcc symmetry are shown in blue, fcc symmetry in green, and hcp symmetry in red.

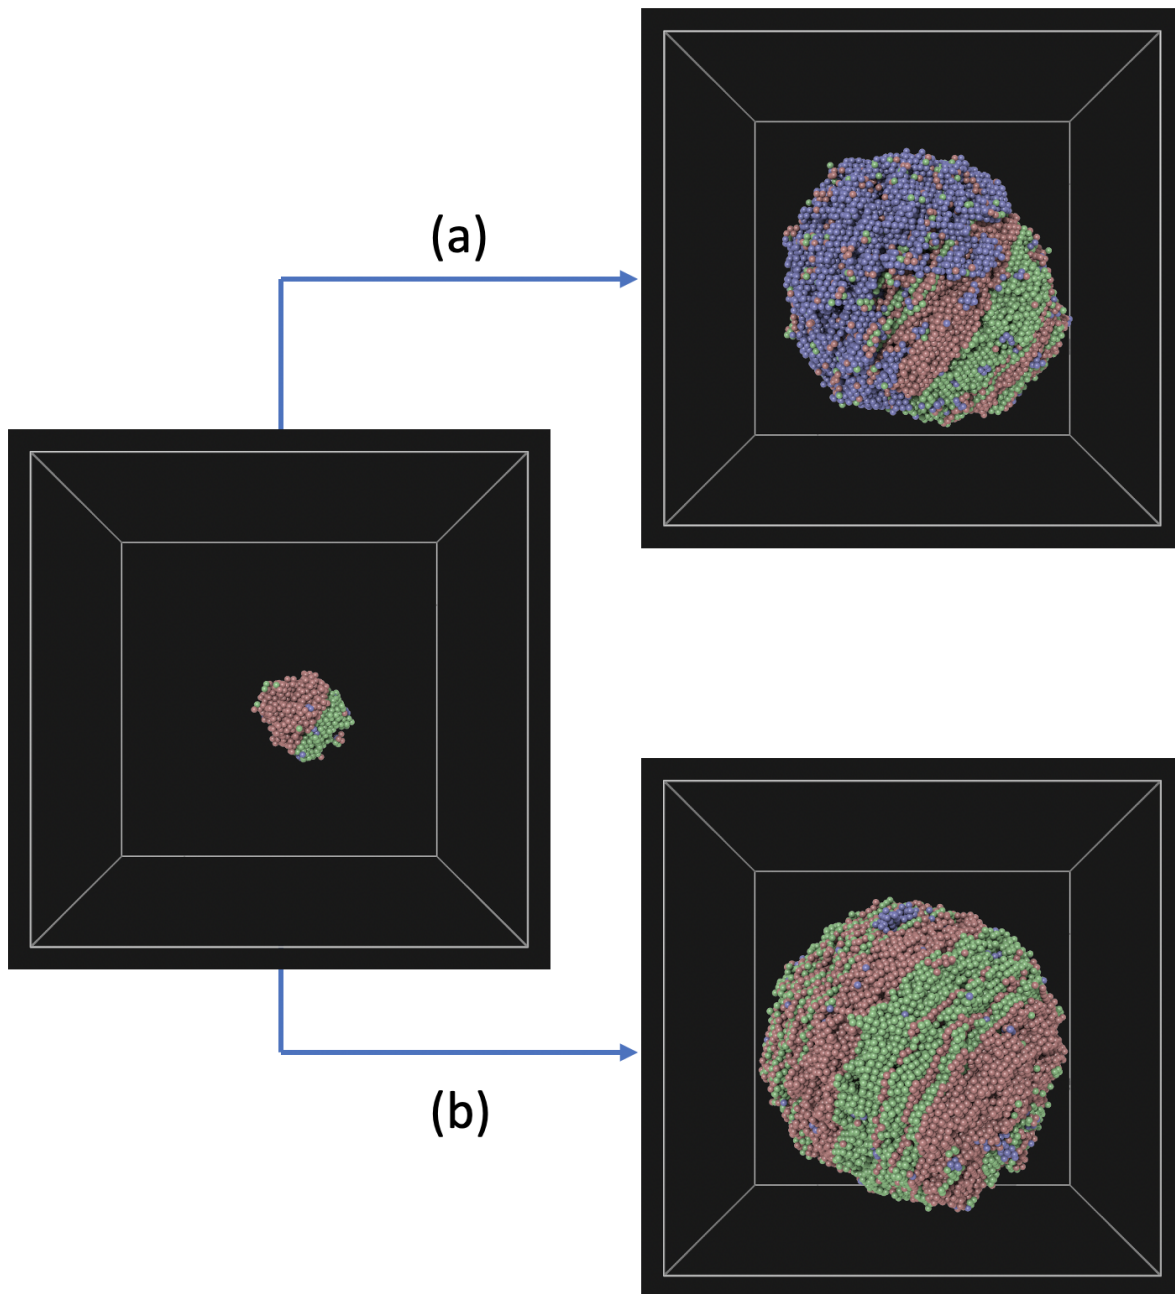

**Fig. S10.** Example of a far-from-equilibrium solid-cluster-phase evolution. An 800-particle cluster is obtained by continuous shrinking of a mixed fcc/hcp cluster, see Fig. 3(d) in the main text, at 70 GPa, via reduction of the total enthalpy of the system in an NPH ensemble. This cluster shrinks and disappears in NPT ensembles at temperatures above 2800 K. Two simulations of cluster growth are shown: (a) Fast growth NPT simulation at 2800 K, and (b) Slow growth NPT simulation starting at 2800 K, and continuously heated at a rate of 0.5 K/ps. Subsequent annealing of the outcomes of both simulations in an NPH ensemble produces the equilibrium embedded fcc/hcp mixed-phase cluster, shown in Fig. 3(d) in the main text. Particles with bcc symmetry are shown in blue, fcc symmetry in green, and hcp symmetry in red.

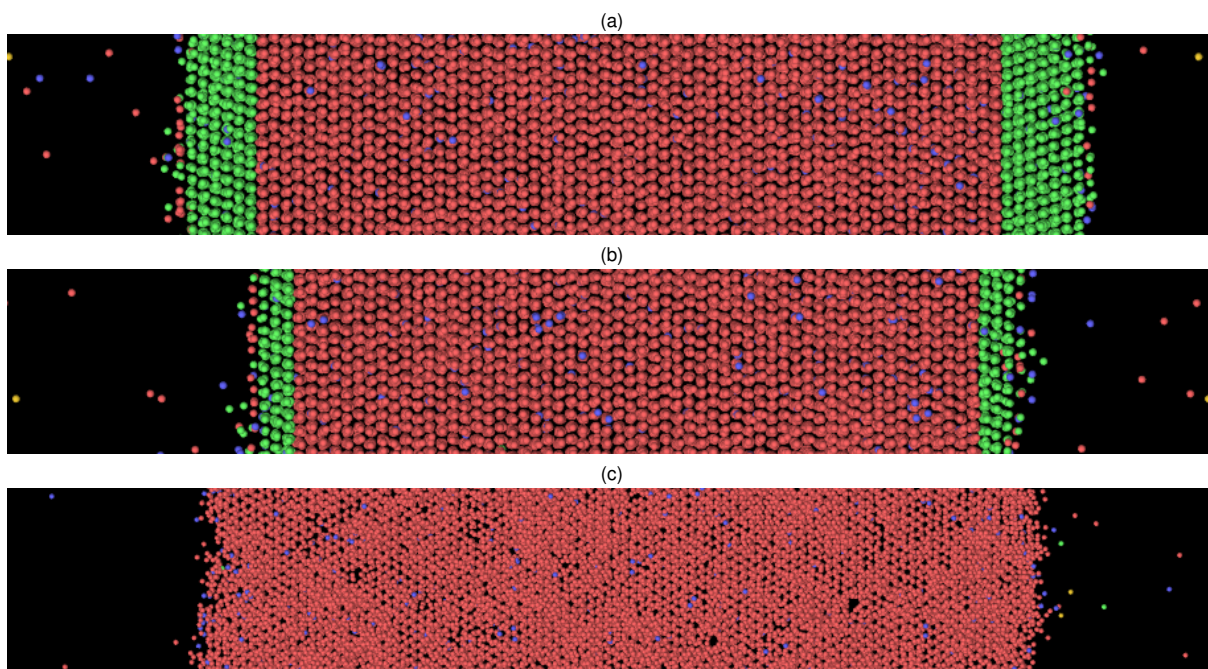

**Fig. S11.** Side views of liquid-solid slab equilibria at 80 GPa. The bulk crystal phase (red particles) is hcp and the green particles represent occurrence of fcc symmetry mainly at the interface with the liquid. The particle symmetries are classified via adaptive cutoff common-neighbor analysis, and the non-crystalline particles have been deleted. (a) and (b) depict hcp-(0001) interfaces with the liquid. At the liquid interface, the solid transforms to fcc domains with fcc-(111) planes parallel to the interface. The two-phase equilibrium temperatures are (a) 3492 K, and (b) 3500 K. (c) depicts hcp-(1120) interfaces with the liquid at a temperature of 3497 K.



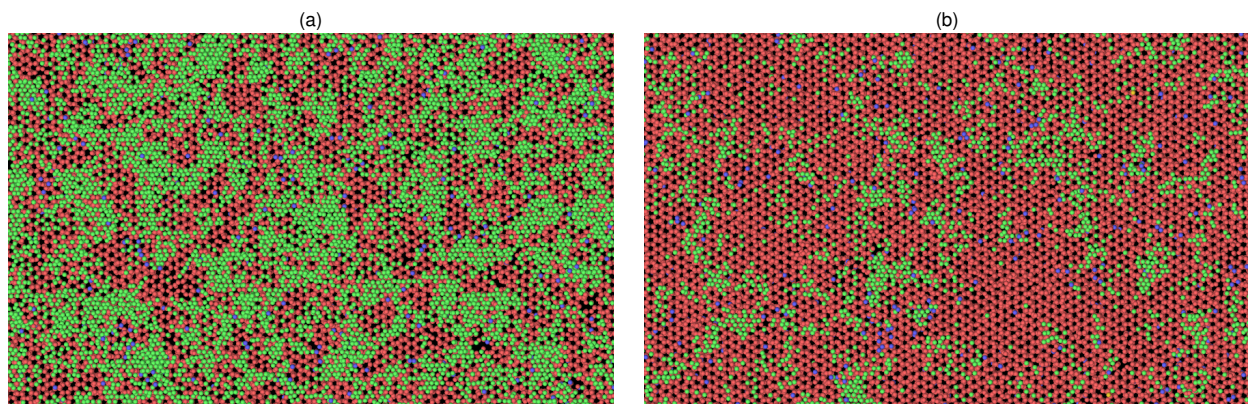

**Fig. S12.** Top view cross sections of the solid liquid-solid equilibria shown in Fig. S11(a) and (b). The bulk crystal phase (red particles) is hcp and the green particles represent occurrence of fcc symmetry right at the interface. The particle symmetries are classified via adaptive cutoff common-neighbor analysis, and the non-crystalline particles have been deleted.

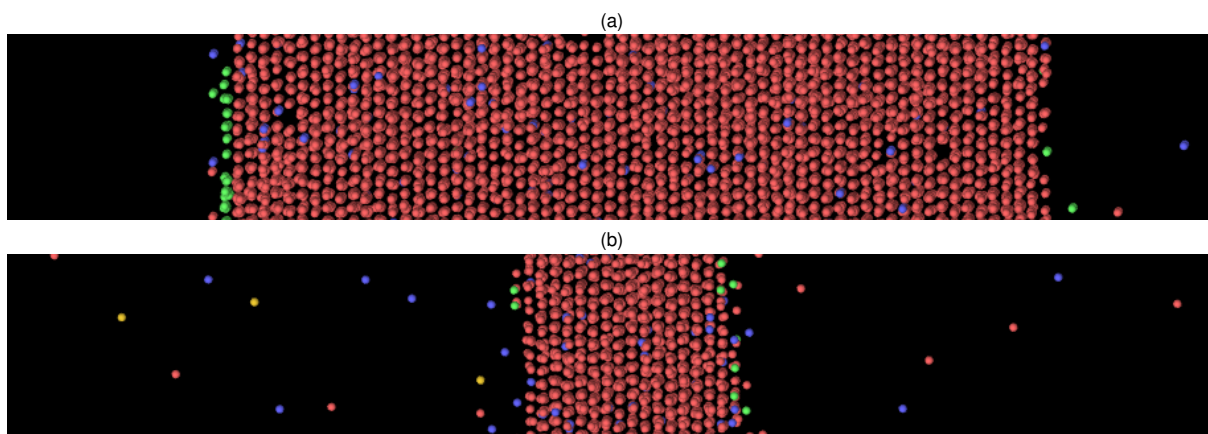

**Fig. S13.** Side view of two snapshots of a solid-liquid system at 80 GPa with the solid phase shrinking due to superheating at 3520 K. (a) initial configuration, and (b) configuration at about 1 ns later. The particles are classified via adaptive cutoff common-neighbor analysis, with the hcp particles colored red, fcc particles green, and bcc particles blue, The non-crystalline particles have been deleted.

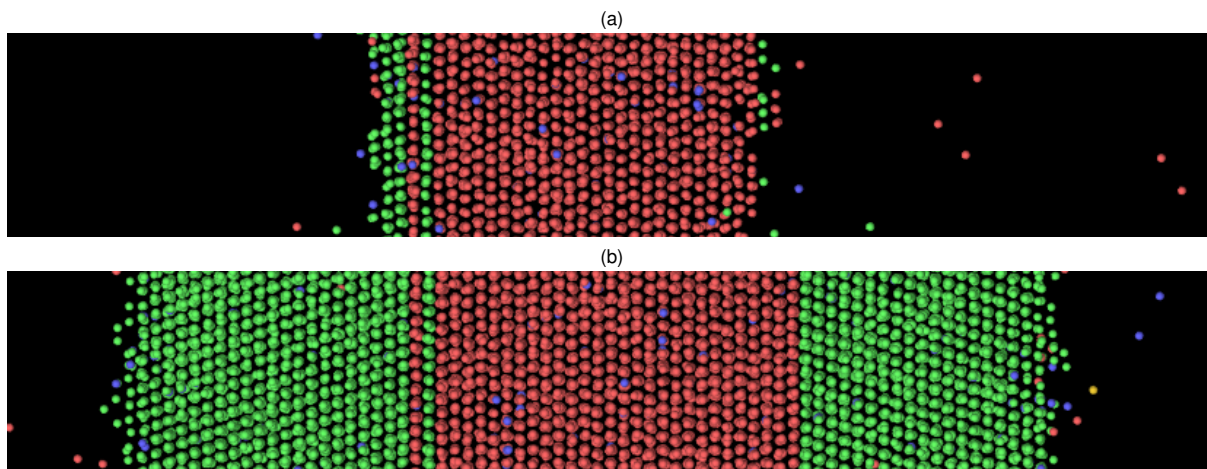

**Fig. S14.** Side view of two snapshots of a solid-liquid system at 80 GPa with the solid phase growing due to undercooling at 3480 K. (a) initial configuration, and (b) configuration at about 3 ns later. The particles are classified via adaptive cutoff common-neighbor analysis, with the hcp particles colored red, fcc particles green, and bcc particles blue. The non-crystalline particles have been deleted. The close-packed stacking sequence is ..BACBACABAB.. at the left interface and ..ABABCABCAB... at the right one, resulting in the twin relation between the left and the right fcc films.

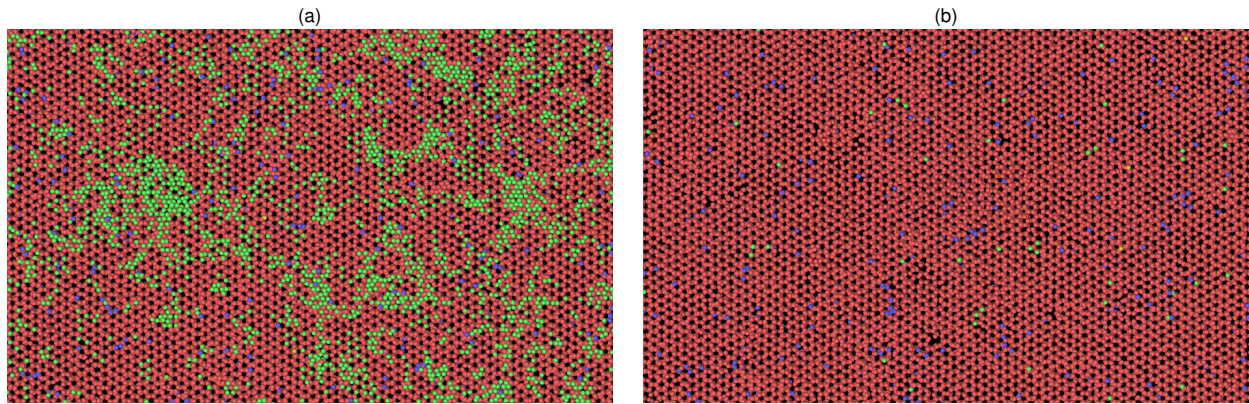

**Fig. S15.** Top view of cross sections of two snap shots of the NPT-MD simulation at  $P = 80$  GPa, and  $T = 3503$  K, shown in Fig 8(b) of the main text. The bulk crystal phase (red particles) is hcp and the solid-liquid interface plane is hcp-(0001). The interface contains fcc domains (green particles) with fcc-(111) planes parallel to the interface. The particles are classified via adaptive cutoff common-neighbor analysis, and the non-crystalline particles have been deleted. The two snap shots are (a) initial configuration at time ( $t = 0$ ) in phase II, and (b) the configuration at time ( $t = 9.5$  ns) in phase I.
